# Supplementary material for: Critical aspects in dissolution testing of nanomaterials in the oro-gastrointestinal tract: the relevance of juice composition for hazard identification and grouping
Source: Royal Society of Chemistry journal article supplement (doi:10.1039/d3na00588g), 2023-12-08
Supplement: d3na00588g1.pdf [file d3na00588g1.pdf]

# Critical aspects in dissolution testing of nanomaterials in the oro-gastrointestinal tract: the relevance of juice composition for hazard identification and grouping

Luisana Di Cristo<sup>1</sup>, Johannes G. Keller<sup>2+</sup>, Luca Leoncino<sup>3</sup>, Valentina Marassi<sup>4</sup>, Frederic Loosli<sup>2,5</sup>, Didem Ag Seleci<sup>2</sup>, Georgia Tsiliki<sup>6</sup>, Agnes G. Oomen<sup>6,9</sup>, Vicki Stone,<sup>7</sup> Wendel Wohlleben<sup>2\*</sup> and Stefania Sabella<sup>1\*</sup>

<sup>1</sup>Istituto Italiano Di Tecnologia, Nanoregulatory Group, D3PharmaChemistry, Genova, Italy

<sup>2</sup>Department of Material Physics and Department of Experimental Toxicology and Ecology, BASF SE, Ludwigshafen, Germany

<sup>3</sup>Electron Microscopy Facility, Istituto Italiano di Tecnologia, Genova, Italy

<sup>4</sup> Department of Chemistry "G. Ciamician", University of Bologna, Italy

<sup>5</sup>University of Vienna, Vienna, Austria

<sup>6</sup>Institute for the Management of Information Systems, Athena Research Center, Marousi, Greece

<sup>7</sup> National Institute for Public Health and the Environment (RIVM), Bilthoven, The Netherlands

<sup>8</sup> Institute of Biological Chemistry, Biophysics and Bioengineering, Heriot-Watt University, Edinburgh, UK

<sup>9</sup> University of Amsterdam, Amsterdam, the Netherlands

+: present address: Procter & Gamble Service GmbH, Sulzbacher Str. 40-50, 65824 Schwalbach am Taunus

++: present address: GSK, Siena, Italy

\*: corresponding authors

**Supporting information**

| Type 1 formulation                                 |                                                    | NANoREG<br>Juice<br>[g/L] | DIN<br>Juice<br>[g/L] |      |
|----------------------------------------------------|----------------------------------------------------|---------------------------|-----------------------|------|
| <b>Saliva</b>                                      | NaCl                                               | 0.29                      | 1.67                  |      |
|                                                    | KSCN                                               | 0.20                      |                       |      |
|                                                    | NaSCN                                              |                           | 0.50                  |      |
|                                                    | Na <sub>2</sub> SO <sub>4</sub>                    | 0.57                      | 1.83                  |      |
|                                                    | NaHCO <sub>3</sub>                                 | 1.69                      | 0.50                  |      |
|                                                    | KCl                                                | 0.90                      | 1.50                  |      |
|                                                    | NaH <sub>2</sub> PO <sub>4</sub> *H <sub>2</sub> O | 1.02                      |                       |      |
|                                                    | KH <sub>2</sub> PO <sub>4</sub>                    |                           | 2.00                  |      |
|                                                    | CaCl <sub>2</sub> *2H <sub>2</sub> O               |                           | 0.50                  |      |
|                                                    | Uric Acid                                          | 0.015                     | 0.33                  |      |
|                                                    | Urea                                               | 0.20                      | 0.03                  |      |
|                                                    | Mucin                                              | 0.025                     | 2.50                  |      |
|                                                    | α-Amylase                                          | 0.29                      | 0.83                  |      |
|                                                    | <b>Stomach</b>                                     | NaCl                      | 2.63                  | 4.14 |
| KCl                                                |                                                    | 0.82                      | 1.00                  |      |
| NaH <sub>2</sub> PO <sub>4</sub> *H <sub>2</sub> O |                                                    | 0.31                      |                       |      |
| KH <sub>2</sub> PO <sub>4</sub>                    |                                                    |                           | 0.38                  |      |
| CaCl <sub>2</sub>                                  |                                                    | 0.31                      |                       |      |
| NH <sub>4</sub> Cl                                 |                                                    | 0.31                      |                       |      |
| Glucose                                            |                                                    | 0.65                      |                       |      |
| Glucuronic acid                                    |                                                    | 0.02                      |                       |      |
| Glucosamine-<br>hydrochloride                      |                                                    | 0.33                      |                       |      |
| Urea                                               |                                                    | 0.085                     |                       |      |
| Pepsin                                             |                                                    | 2.50                      | 1.43                  |      |
| Mucin                                              |                                                    | 3.00                      | 4.28                  |      |
| BSA                                                |                                                    | 1.00                      |                       |      |
| <b>Duodenum</b>                                    |                                                    | KCl                       | 0.56                  | 0.30 |
|                                                    | CaCl <sub>2</sub>                                  | 0.15                      |                       |      |
|                                                    | CaCl <sub>2</sub> *2H <sub>2</sub> O <sub>2</sub>  |                           | 0.50                  |      |
|                                                    | MgCl <sub>2</sub> *6H <sub>2</sub> O               | 0.05                      | 0.20                  |      |
|                                                    | NaHCO <sub>3</sub>                                 | 3.39                      | 1.00                  |      |
|                                                    | KH <sub>2</sub> PO <sub>4</sub>                    | 0.08                      |                       |      |
|                                                    | Urea                                               | 0.10                      | 0.30                  |      |
|                                                    | NaCl                                               | 7.01                      |                       |      |
|                                                    | Pancreatin                                         | 9.00                      | 9.00                  |      |
|                                                    | Trypsin                                            |                           | 0.30                  |      |
|                                                    | BSA                                                | 1.00                      |                       |      |
|                                                    | Lipase                                             | 1.50                      |                       |      |
|                                                    | <b>Bile</b>                                        | NaCl                      | 5.26                  |      |
|                                                    |                                                    | NaHCO <sub>3</sub>        | 5.78                  |      |
| KCl                                                |                                                    | 0.38                      |                       |      |
| CaCl <sub>2</sub>                                  |                                                    | 0.17                      |                       |      |
| Urea                                               |                                                    | 0.25                      |                       |      |
| BSA                                                |                                                    | 1.80                      |                       |      |
| Bile                                               |                                                    | 30.00                     | 9.00                  |      |

**Table SI1.** Molecular composition of simulant saliva, stomach or intestinal juice - Type 1 formulation (NR and DIN 1 juices). The reported values are related to the concentration that each component has in the corresponding digestive fluid: The inorganic, organic/protein and enzyme components are identified by the colors blue, orange and green respectively.

| NanoREG Juice (Type 1) |                          | [g/L]  | NanoREG Juice (Type 2) |                   | [g/L]      |      |
|------------------------|--------------------------|--------|------------------------|-------------------|------------|------|
| Saliva                 | NaCl                     | 0.29   | Saliva                 | NaCl              | 0.29       |      |
|                        | KSCN                     | 0.20   |                        | KSCN              | 0.20       |      |
|                        | Na2SO4                   | 0.57   |                        | Na2SO4            | 0.57       |      |
|                        | NaHCO3                   | 1.69   |                        | NaHCO3            | 1.69       |      |
|                        | KCl                      | 0.90   |                        | KCl               | 0.90       |      |
|                        | NaH2PO4*H2O              | 1.02   |                        | NaH2PO4*H2O       | 1.02       |      |
|                        | Uric Acid                | 0.015  |                        |                   |            |      |
|                        | Urea                     | 0.20   |                        |                   |            |      |
|                        | Mucin                    | 0.025  |                        |                   |            |      |
|                        | $\alpha$ -Amylase        | 0.29   |                        | $\alpha$ -Amylase | 0.29       |      |
| Stomach                | NaCl                     | 2.63   | Stomach                | NaCl              | 2.63       |      |
|                        | KCl                      | 0.82   |                        | KCl               | 0.82       |      |
|                        | NaH2PO4*H2O              | 0.31   |                        | NaH2PO4*H2O       | 0.31       |      |
|                        | CaCl2                    | 0.31   |                        | CaCl2             | 0.31       |      |
|                        | NH4Cl                    | 0.31   |                        | NH4Cl             | 0.31       |      |
|                        | Glucose                  | 0.65   |                        |                   |            |      |
|                        | Glucuronic acid          | 0.02   |                        |                   |            |      |
|                        | Glucosaminehydrochloride | 0.33   |                        |                   |            |      |
|                        | Urea                     | 0.085  |                        |                   |            |      |
|                        | Pepsin                   | 2.50   |                        | Pepsin            | 2.50       |      |
| Duodenum               | Mucin                    | 3.00   | Duodenum               |                   |            |      |
|                        | BSA                      | 1.00   |                        |                   |            |      |
|                        | KCl                      | 0.56   |                        | Duodenum          | KCl        | 0.56 |
|                        | CaCl2                    | 0.15   |                        |                   | CaCl2      | 0.15 |
|                        | MgCl2*6H2O               | 0.05   |                        |                   | MgCl2*6H2O | 0.05 |
|                        | NaHCO3                   | 3.39   |                        |                   | NaHCO3     | 3.39 |
|                        | KH2PO4                   | 0.08   |                        |                   | KH2PO4     | 0.08 |
|                        | Urea                     | 0.10   |                        |                   |            |      |
|                        | NaCl                     | 7.01   |                        |                   | NaCl       | 7.01 |
|                        | Pancreatin               | 9.00   |                        |                   | Pancreatin | 9.00 |
| BSA                    | 1.00                     |        |                        |                   |            |      |
| Lipase                 | 1.50                     | Lipase | 1.50                   |                   |            |      |
| Bile                   | NaCl                     | 5.26   | Bile                   | NaCl              | 5.26       |      |
|                        | NaHCO3                   | 5.78   |                        | NaHCO3            | 5.78       |      |
|                        | KCl                      | 0.38   |                        | KCl               | 0.38       |      |
|                        | CaCl2                    | 0.17   |                        | CaCl2             | 0.17       |      |
|                        | Urea                     | 0.25   |                        |                   |            |      |
|                        | BSA                      | 1.80   |                        |                   |            |      |
|                        | Bile                     | 30.00  |                        |                   |            |      |

  

| NanoREG Juice (Type 3)   |             | [g/L] | NanoREG Juice (Type 4) |             | [g/L]      |      |
|--------------------------|-------------|-------|------------------------|-------------|------------|------|
| Saliva                   | NaCl        | 0.29  | Saliva                 | NaCl        | 0.29       |      |
|                          | KSCN        | 0.20  |                        | KSCN        | 0.20       |      |
|                          | Na2SO4      | 0.57  |                        | Na2SO4      | 0.57       |      |
|                          | NaHCO3      | 1.69  |                        | NaHCO3      | 1.69       |      |
|                          | KCl         | 0.90  |                        | KCl         | 0.90       |      |
|                          | NaH2PO4*H2O | 1.02  |                        | NaH2PO4*H2O | 1.02       |      |
|                          | Uric Acid   | 0.015 |                        |             |            |      |
|                          | Urea        | 0.20  |                        |             |            |      |
|                          | Mucin       | 0.025 |                        |             |            |      |
|                          | Stomach     | NaCl  |                        | 2.63        | Stomach    | NaCl |
| KCl                      |             | 0.82  | KCl                    | 0.82        |            |      |
| NaH2PO4*H2O              |             | 0.31  | NaH2PO4*H2O            | 0.31        |            |      |
| CaCl2                    |             | 0.31  | CaCl2                  | 0.31        |            |      |
| NH4Cl                    |             | 0.31  | NH4Cl                  | 0.31        |            |      |
| Glucose                  |             | 0.65  |                        |             |            |      |
| Glucuronic acid          |             | 0.02  |                        |             |            |      |
| Glucosaminehydrochloride |             | 0.33  |                        |             |            |      |
| Urea                     |             | 0.085 |                        |             |            |      |
| Mucin                    |             | 3.00  |                        |             |            |      |
| Duodenum                 | BSA         | 1.00  | Duodenum               |             |            |      |
|                          | KCl         | 0.56  |                        | Duodenum    | KCl        | 0.56 |
|                          | CaCl2       | 0.15  |                        |             | CaCl2      | 0.15 |
|                          | MgCl2*6H2O  | 0.05  |                        |             | MgCl2*6H2O | 0.05 |
|                          | NaHCO3      | 3.39  |                        |             | NaHCO3     | 3.39 |
|                          | KH2PO4      | 0.08  |                        |             | KH2PO4     | 0.08 |
|                          | Urea        | 0.10  |                        |             |            |      |
|                          | NaCl        | 7.01  |                        |             | NaCl       | 7.01 |
|                          | BSA         | 1.00  |                        |             |            |      |
|                          | Bile        | NaCl  |                        |             | 5.26       | Bile |
| NaHCO3                   |             | 5.78  | NaHCO3                 |             | 5.78       |      |
| KCl                      |             | 0.38  | KCl                    | 0.38        |            |      |
| CaCl2                    |             | 0.17  | CaCl2                  | 0.17        |            |      |
| Urea                     |             | 0.25  |                        |             |            |      |
| BSA                      |             | 1.80  |                        |             |            |      |
| Bile                     | 30.00       |       |                        |             |            |      |

**Table S12.** Molecular composition of NanoREG (NR) juice of sub-group formulations - Type 1, 2, 3 and 4. The reported values are related to the concentration that each component has in the corresponding fluid. The inorganic, organic/protein and enzyme components are identified by the colors blue, orange and green respectively.

| DIN Juice (Type 1) |                                      | [g/L] | DIN Juice (Type 3) |                                      | [g/L] |
|--------------------|--------------------------------------|-------|--------------------|--------------------------------------|-------|
| Saliva             | NaCl                                 | 1.67  | Saliva             | NaCl                                 | 1.67  |
|                    | NaSCN                                | 0.50  |                    | NaSCN                                | 0.50  |
|                    | Na <sub>2</sub> SO <sub>4</sub>      | 1.83  |                    | Na <sub>2</sub> SO <sub>4</sub>      | 1.83  |
|                    | NaHCO <sub>3</sub>                   | 0.50  |                    | NaHCO <sub>3</sub>                   | 0.50  |
|                    | KCl                                  | 1.50  |                    | KCl                                  | 1.50  |
|                    | KH <sub>2</sub> PO <sub>4</sub>      | 2.00  |                    | KH <sub>2</sub> PO <sub>4</sub>      | 2.00  |
|                    | CaCl <sub>2</sub> *2H <sub>2</sub> O | 0.50  |                    | CaCl <sub>2</sub> *2H <sub>2</sub> O | 0.50  |
|                    | Uric acid                            | 0.33  |                    | Uric acid                            | 0.33  |
|                    | Urea                                 | 0.03  |                    | Urea                                 | 0.03  |
|                    | Mucin                                | 2.50  |                    | Mucin                                | 2.50  |
| α-Amylase          | 0.83                                 |       |                    |                                      |       |
| Stomach            | NaCl                                 | 4.14  | Stomach            | NaCl                                 | 4.14  |
|                    | KCl                                  | 1.00  |                    | KCl                                  | 1.00  |
|                    | KH <sub>2</sub> PO <sub>4</sub>      | 0.38  |                    | KH <sub>2</sub> PO <sub>4</sub>      | 0.38  |
|                    | Mucin                                | 4.28  |                    | Mucin                                | 4.28  |
|                    | Pepsin                               | 1.43  |                    |                                      |       |
| Duodenum           | KCl                                  | 0.30  | Duodenum           | KCl                                  | 0.30  |
|                    | CaCl <sub>2</sub> *2H <sub>2</sub> O | 0.50  |                    | CaCl <sub>2</sub> *2H <sub>2</sub> O | 0.50  |
|                    | MgCl <sub>2</sub> *6H <sub>2</sub> O | 0.20  |                    | MgCl <sub>2</sub> *6H <sub>2</sub> O | 0.20  |
|                    | NaHCO <sub>3</sub>                   | 1.00  |                    | NaHCO <sub>3</sub>                   | 1.00  |
|                    | Urea                                 | 0.30  |                    | Urea                                 | 0.30  |
|                    | Pancreatin                           | 9.00  |                    |                                      | 9.00  |
|                    | Trypsin                              | 0.30  |                    |                                      |       |
| Bile               | Bile                                 | 9.00  | Bile               | Bile                                 | 9.00  |

**Table S13.** Molecular composition of DIN juice sub-groups (Type 1 and 3). The reported values are related to the concentration that each component has in the corresponding fluid. The inorganic, organic/protein and enzyme components are identified by the colors blue, orange and green respectively.

| NF concentration (mg/L) | M <sub>0</sub> (mg/L) | M <sub>ion (s)</sub> (mg/L) | M <sub>ion (st)</sub> (mg/L) | M <sub>ion (int1)</sub> (mg/L) | M <sub>ion (int2)</sub> (mg/L) | t <sub>1/2</sub> of int1 (hours) |
|-------------------------|-----------------------|-----------------------------|------------------------------|--------------------------------|--------------------------------|----------------------------------|
| 25                      | 19.095±0.98           | 0.76±0.16                   | 0.81±0.04                    | 0.45±0.04                      | 0.53±0.02                      | 0.09±0.03                        |
| 50                      | 39.00±0.64            | 0.77±0.10                   | 1.78±0.81                    | 0.82±0.15                      | 0.91±0.12                      | 0.56±0.28                        |
| 100                     | 67.93±1.85            | 0.87±0.06                   | 2.53±0.42                    | 1.29±0.09                      | 1.33±0.29                      | 0.95±0.23                        |
| 250                     | 172.90±23.38          | 1.74±0.40                   | 8.35±0.67                    | 3.20±0.19                      | 3.53±0.23                      | 0.66±0.24                        |
| 500                     | 314.28±46,93          | 2.03±0.47                   | 16.21±2.45                   | 6.19±0,65                      | 6.44±0.80                      | 0.77±0.03                        |
| 1000                    | 674.19±29.98          | 2.48±0.68                   | 33.97±1.47                   | 11.61±1.33                     | 11.74±0.82                     | 0.88±0.37                        |

**Table S14.** Concentration (mg/L) of zinc ions as measured in the saliva (s) stomach (st) and intestine (int1 and int2) compartments. M<sub>0</sub> is the total ion concentration of the NF at time 0, supposing a 100% of dissolution (the calculated M<sub>0</sub> is diluted with the respect of digestive compartment dilution factor in which NFs undergo digestion, namely 1/7; 1/19; 1/39). The last column refers to the calculation of the dissolution half-life (t<sub>1/2</sub>) measured after 155 min of OGI digestion, and it is expressed in hour accordingly to the formula as reported in Methods. Data is expressed as average ± SD (n ≥3).

| DIN Type 1                                  | Particles                                | Dissolved analyte (ion or organic molecule) |               |              |              |            |           |
|---------------------------------------------|------------------------------------------|---------------------------------------------|---------------|--------------|--------------|------------|-----------|
|                                             | Concentration of analyte in saliva, mg/L | intestine, mg/L                             | stomach, mg/L | saliva, mg/L | intestine, % | stomach, % | saliva, % |
| TiO2 NM105 (nano, rutile/anatase)           | 398                                      | 0.025                                       | 0.039         | 0.052        | 0.042        | 0.032      | 0.013     |
| TiO2 E171 (non-nano, anatase)               | 405                                      | 0.022                                       | 0.03          | 0.059        | 0.036        | 0.025      | 0.015     |
|                                             |                                          |                                             |               |              |              |            |           |
| BaSO4 NM220                                 | 394                                      | 1.722                                       | 0.967         | 2.889        | 28.1         | 7.9        | 7.1       |
|                                             |                                          |                                             |               |              |              |            |           |
| SiO2 NM200                                  | 313                                      | 5.237                                       | 2.451         | 1.843        | 11.15        | 2.61       | 0.59      |
|                                             |                                          |                                             |               |              |              |            |           |
| Zn NM110                                    | 67                                       | 1.40                                        | 12.96         | n.d.         | 17.34        | 80.10      | n.d.      |
| Zn NM110 *                                  | 67                                       | 2.37                                        | 11.14         | n.d.         | 29.31        | 68.82      | n.d.      |
| Zn NM110 **                                 | 67                                       | 5.50                                        | 12.70         | n.d.         | 68.00        | 78.00      | n.d.      |
| Zn NM110 ***                                | 67                                       | 3.35                                        | 12.62         | n.d.         | 41.39        | 77.97      | n.d.      |
|                                             |                                          |                                             |               |              |              |            |           |
|                                             |                                          |                                             |               |              |              |            |           |
| <b>DIN Type 3</b>                           |                                          |                                             |               |              |              |            |           |
| CeO2 NM211                                  | 58                                       | 0                                           | 0.07          | 0.003        | 0.040        | 0.406      | -0.001    |
| CeO2 NM212                                  | 57                                       | 0.001                                       | 0.065         | 0.0004       | 0.005        | 0.383      | 0.002     |
|                                             |                                          |                                             |               |              |              |            |           |
| TiO2 NM105 (nano, rutile/anatase)           | 404                                      | 0.005                                       | 0.026         | 0.058        | 0.008        | 0.022      | 0.014     |
| TiO2 E171 (non-nano, anatase)               | 402                                      | 0.007                                       | 0.013         | 0.053        | 0.012        | 0.011      | 0.013     |
|                                             |                                          |                                             |               |              |              |            |           |
| Pigment Red 254 nano (DPP)                  | 6711                                     | 0.022                                       | 1.57E-05      | 0.00015      | 3.5E-03      | 1.1E-06    | 2.2E-06   |
| Pigment Red 254 non-nano (DPP)              | 6695                                     | 0.143                                       | 9.60E-05      | 0.00016      | 2.4E-02      | 7.2E-06    | 2.4E-06   |
|                                             |                                          |                                             |               |              |              |            |           |
| Pigment Yellow 110 nano (Isoindolinone)     | 6710                                     | 0.27                                        | 0.092         | 0.184        | 0.051        | 0.002      | 0.002     |
| Pigment Yellow 110 non-nano (Isoindolinone) | 6700                                     | 0.33                                        | 0.033         | 0.102        | 0.041        | 0.006      | 0.003     |
|                                             |                                          |                                             |               |              |              |            |           |
| Pigment Yellow 62 (ML2A)                    | 3717                                     | 1.15                                        | 0.78          | 1.28         | 0.179        | 0.053      | 0.019     |
| Pigment Yellow 168 (ML2A)                   | 3760                                     | 1.34                                        | 0.73          | 1.55         | 0.206        | 0.049      | 0.023     |
|                                             |                                          |                                             |               |              |              |            |           |
| BaSO4 NM220                                 | 400                                      | 0.772                                       | 0.249         | 1.317        | 11.700       | 1.900      | 3.000     |
|                                             |                                          |                                             |               |              |              |            |           |
| SiO2 DQ12 (quartz)                          | 398                                      | 0.210                                       | 0.179         | 0.371        | 0.448        | 0.191      | 0.119     |
| SiO2 NM200                                  | 314                                      | 3.96                                        | 0.7           | 0.71         | 8.404        | 0.744      | 0.227     |
|                                             |                                          |                                             |               |              |              |            |           |
| ZnO NM110 (nano)                            | 68                                       | 0.033                                       | 19.96         | 1.38         | 0.365        | 99.645     | 2.081     |
| ZnO NM110 (nano) *                          | 68                                       | 0.083                                       | 12.6          | n.d.         | 1.018        | 77.053     | n.d.      |
| ZnO NM111 (nano, coated)                    | 73                                       | 0.03                                        | 22.3          | 1.95         | 0.255        | 99.000     | 3.000     |
| ZnO NM113 (non-nano)                        | 65                                       | 0.035                                       | 19.6          | 1.57         | 0.351        | 94.000     | 2.000     |

**Table S15.** Dissolution results upon cascade *in vitro* digestion assay with DIN Juice (Type 1 and 3). The results are reported in the originally measured ion concentration (mg/L) and as dissolved fraction (% dissolved). \* same incubation sample quantified by 1h ultracentrifugation at 40,000g (instead of 0.02µm filtration) and dilution in 1% HNO<sub>3</sub> for ICPMS; \*\* same incubation sample quantified by 1h ultracentrifugation at 40,000g, then microwave digestion of organics and analysis by ICPOES. \*\*\* same incubation sample quantified by 1h ultracentrifugation at 40,000g, and dilution in 1% HNO<sub>3</sub> for ICPMS, with matrix-matched calibration in diluted OGI fluid mix.

| Sample                                                      | Crystallite size in nm | Uncertainty in nm | Difference significant? | Evaluated diffraction peak angle |
|-------------------------------------------------------------|------------------------|-------------------|-------------------------|----------------------------------|
| TiO <sub>2</sub> E171 after digestion                       | 46                     | 5                 | no                      | 25.4 °                           |
| TiO <sub>2</sub> E171 pristine                              | 56                     | 6                 |                         | 25.4 °                           |
| Pigment Yellow 110 nano (Isoindolinone) after digestion     | 12                     | 1                 | borderline              | 25.1 °                           |
| Pigment Yellow 110 nano (Isoindolinone) Pristine            | 16                     | 2                 |                         | 25.1 °                           |
| Pigment Yellow 110 non-nano (Isoindolinone) after digestion | 26                     | 3                 | no                      | 25.1 °                           |
| Pigment Yellow 110 non-nano (Isoindolinone) Pristine        | 29                     | 3                 |                         | 25.1 °                           |
| Pigment Yellow 62 (ML2A) after digestion                    | 27                     | 3                 | borderline              | 10.6 °                           |
| Pigment Yellow 62 (ML2A) Pristine                           | 39                     | 4                 |                         | 10.6 °                           |
| Pigment Yellow 168 (ML2A) after digestion                   | 26                     | 3                 | borderline              | 10.5 °                           |
| Pigment Yellow 168 (ML2A) Pristine                          | 36                     | 4                 |                         | 10.5 °                           |
| Pigment Red 254 nano (DPP) after digestion                  | 16                     | 2                 | no                      | 25.7 °                           |
| Pigment Red 254 nano (DPP) Pristine                         | 19                     | 2                 |                         | 25.7 °                           |
| Pigment Red 254 non-nano (DPP) after digestion              | 22                     | 2                 | borderline              | 25.7 °                           |
| Pigment Red 254 non-nano (DPP) Pristine                     | 32                     | 3                 |                         | 25.7 °                           |
| Background OGI fluids                                       | /                      |                   |                         | /                                |

**Table S16.** Crystallite size from XRD line broadening as an approach to the potential transformation of TiO<sub>2</sub> E171 as negative control and of organic pigments after the cascade *in vitro* digestion assay with DIN Type 1, compared to the pristine reference peaks and to the background of a blank run without pigments. The difference is considered as borderline significant when the difference exceeds the combined uncertainty, which is estimated at 10% of the measured crystallite size. None of the results exceeds twice the combined uncertainty, which would be considered as significant change.

| NR Type 1                        | Particles                | Dissolved analyte (ion or organic molecule) |                  |              |              |             |            |
|----------------------------------|--------------------------|---------------------------------------------|------------------|--------------|--------------|-------------|------------|
|                                  | M <sub>0</sub><br>(mg/L) | Intestine,<br>mg/L                          | stomach,<br>mg/L | saliva, mg/L | intestine, % | stomach, %  | saliva, %  |
| TiO <sub>2</sub> NM101           | 24.2±1.16                | 0.006±0.001                                 | 0.009±0.002      | 0.004±0.001  | 1.03±0.29    | 0.77±0.19   | 0.14±0.03  |
| TiO <sub>2</sub> E171            | 27.51±0.95               | 0.006±0.002                                 | 0.008±0.0009     | 0.004±0.003  | 0.95±0.33    | 0.58±0.04   | 0.10±0.08  |
| TiO <sub>2</sub> NM103           | 27.13±1.87               | 0.004±0.0005                                | 0.004±0.001      | 0.018±0.003  | 0.71±0.11    | 0.35±0.13   | 0.50±0.09  |
| ZnO NM110                        | 39.00±0.64               | 0.91±0.12                                   | 1.78±0.81        | 0.77±0.10    | 85.92±7.79   | 89.68±22.58 | 13.28±0.92 |
| ZnO NM111                        | 40.78±3.44               | 0.88±0.05                                   | 2.28±0.54        | 0.23±0.04    | 76.7±4.81    | 83.81±7.22  | 3.88±0.39  |
| SiO <sub>2</sub> NM200           | 434.31±28.84             | 0.99±0.36                                   | 0.51±0.29        | 2.23±0.28    | 8.96±3.33    | 2.18±1.18   | 3.09±1.10  |
| SiO <sub>2</sub> NM203           | 448.10±24.31             | 1.04±0.28                                   | 0.46±0.35        | 2.25±0.10    | 11.48±4.42   | 2.05±1.71   | 3.58±0.08  |
| SiO <sub>2</sub> , Silica_Al     | 588.31±45.38             | 0.93±0.18                                   | 0.43±0.23        | 0.47±0.19    | 5.96±1.73    | 1.44±0.83   | 0.52±0.19  |
| SiO <sub>2</sub> , Silica_Silane | 599.06±20.49             | 0.80±0.35                                   | 0.18±0.10        | 0.014±0.04   | 5.14±2.09    | 0.60±0.33   | 0.16±0.05  |
| SiO <sub>2</sub> , Silica_Std    | 569.20±38.58             | 1.17±0.18                                   | 1.04±0.29        | 2.76±0.93    | 8.08±1.73    | 3.45±1.14   | 3.23±1.08  |
| SiO <sub>2</sub> , MCM60         | 417.99±14.59             | 7.23±0.17                                   | 2.29±0.18        | 33.07±1.17   | 67.52±1.66   | 10.43±0.84  | 55.38±1.97 |
| SiO <sub>2</sub> , MCM170        | 712.14±22.72             | 10.24±1.10                                  | 3.08±0.29        | 12.15±1.39   | 56.11±6.07   | 8.21±0.79   | 11.94±1.36 |
| Ag, NM300K                       | 41.04±7.37               | 0.02±0.02                                   | 0.45±0.18        | 0.10±0.03    | 2.01±1.48    | 21.26±8.35  | 1.71±0.37  |

**Table S17.** Dissolution results upon cascade in vitro digestion assay with NR Juice (Type 1). The results are reported in the originally measured ion concentration (mg/L) as measured by UF/ICP-OES and as dissolved fraction (% dissolved). NF concentration is 50 mg/L for TiO<sub>2</sub>, ZnO and Ag NFs and 1000 mg/L for SiO<sub>2</sub> NFs.



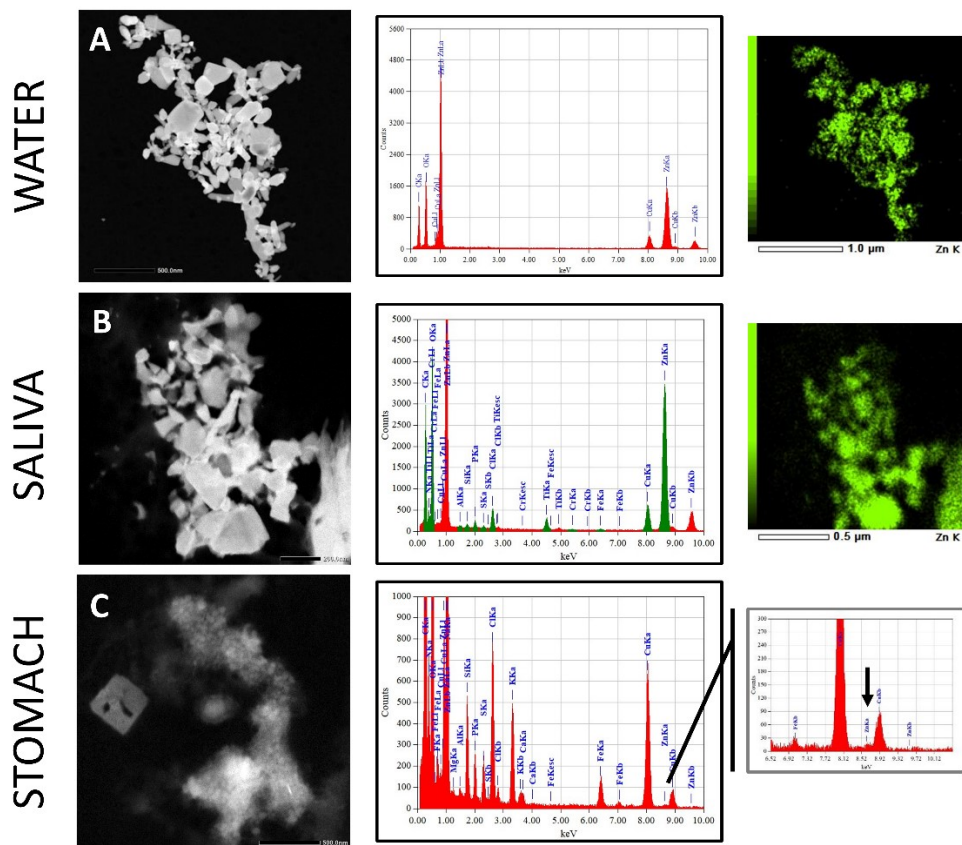

**Figure S11.** Biotransformation of NM110 (ZnO) upon the cascade *in vitro* digestion assay by using Type 1 Formulation (NR juices) followed by STEM-EDX analysis. Annular Dark Field STEM images of NM110 before digestion in water (50mg/L (A) and after digestion in saliva (B) and in stomach (C). Images are taken as soon as possible the addition of any juices. EDX spectra on central column show the elemental composition of the corresponding areas while EDX maps on the right column show the spatial distribution of Zn.

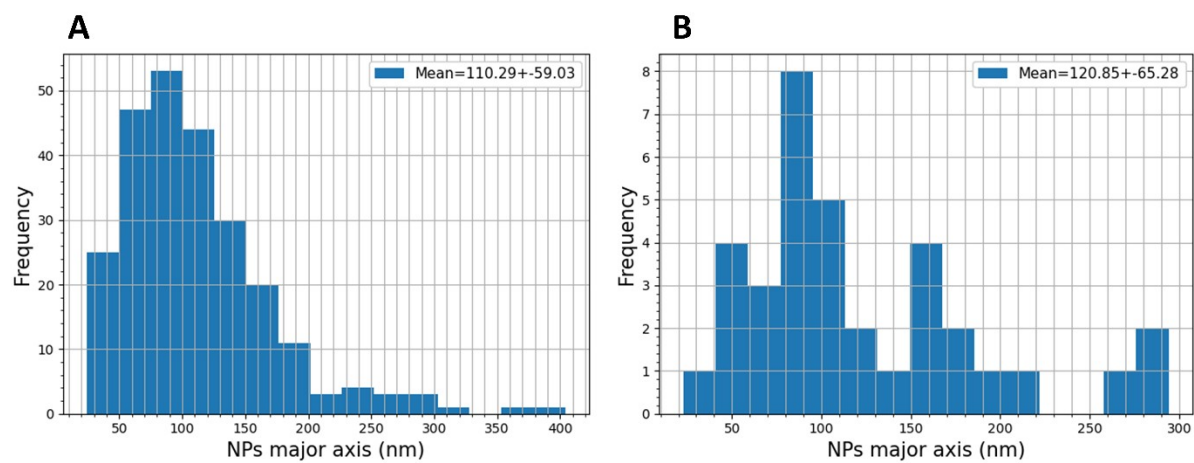

**Figure S12.** Size distribution by TEM of NM110 (ZnO) in water (A) and in saliva after 5 minutes of incubation (B).

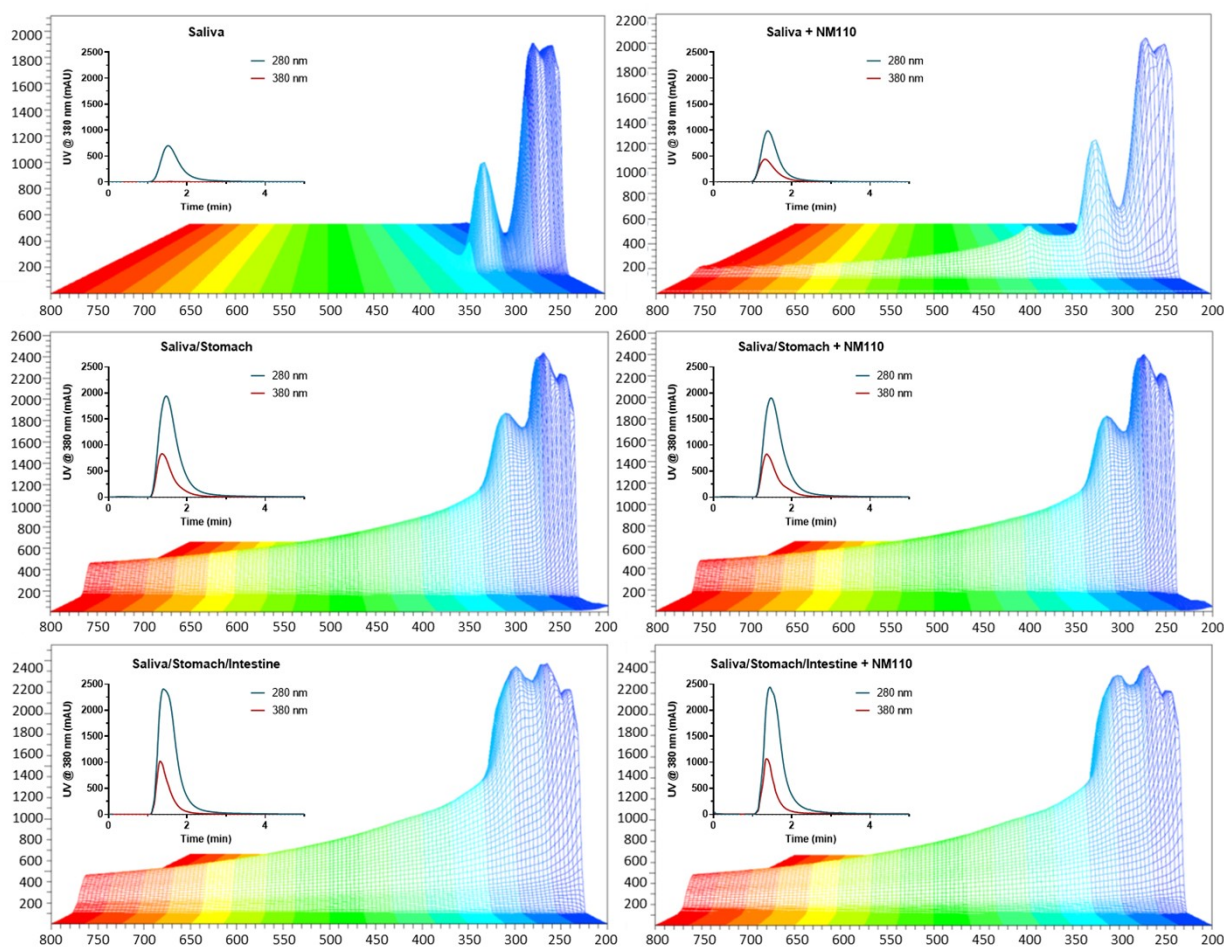

**Figure S13.** FIA UV signals and 3D absorption spectra acquired in flow during HF5 characterization of ZnO NPs along the cascade in vitro digestion assay (NM110 500mg/L). For 3D spectra, horizontal axis represents wavelength (nm), depth axis represents time (min), height axis represents absorption intensity (mAU). (A) Saliva compartment spectra without NM110. (B) Spectrum of saliva containing NM110. (C) Spectrum of the stomach compartment alone. (D) Spectrum of the stomach compartment containing NM110 from cascade digestion. (E) Spectrum of the intestine compartment alone. (F) Spectrum of the intestine compartment containing NM110 from cascade digestion (int2).

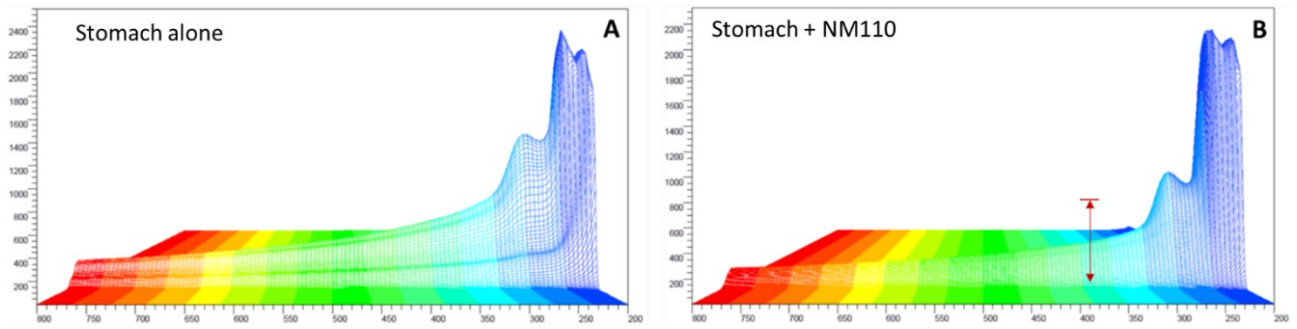

**Figure S14.** 3D absorption spectra acquired in flow during HF5 characterization of ZnO NFs spiked in the stomach compartment (final concentration of NM110 of 250 mg/L). For 3D spectra, horizontal axis represents wavelength (nm), depth axis represents time (min), height axis represents absorption intensity (mAU). (A) Stomach compartment spectra alone. (B) Stomach spectra after addition of NM110 (ratio 1:1) (time 0). Red arrow: expected signal due to NM110 NMs in case of no dissolution.

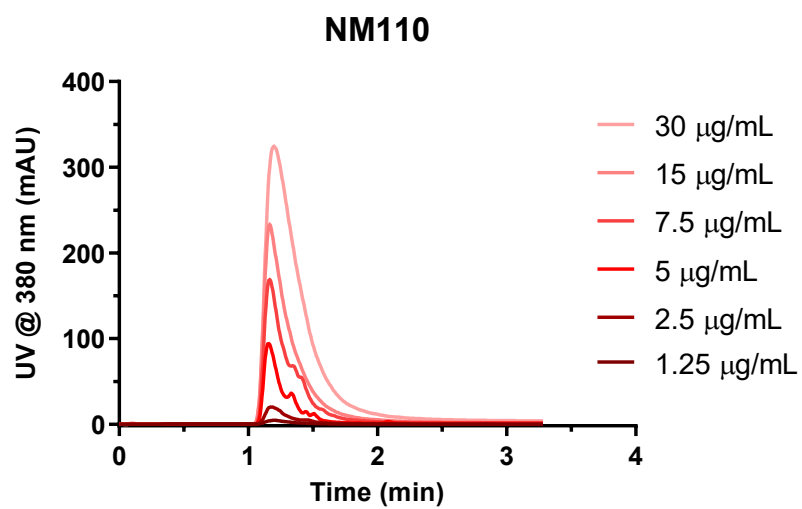

**FigureS15.** FIA UV absorption profile of increasing amounts of NM110 in water.

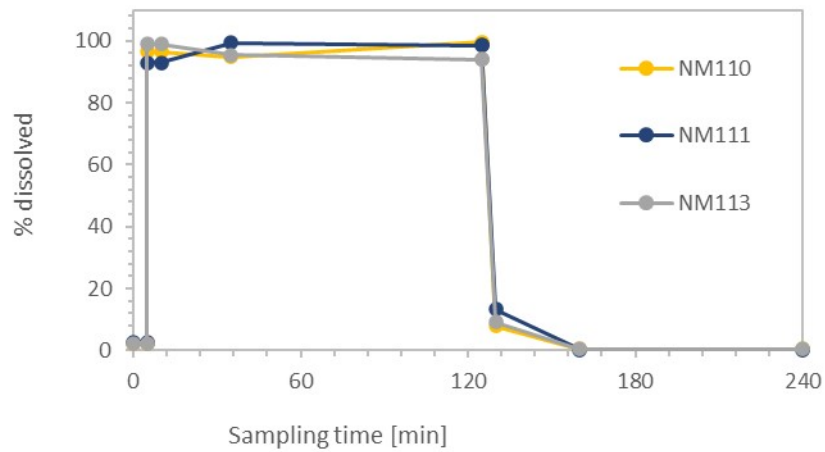

**Figure S16.** Dissolution kinetics of ZnO NFs (NM110 and NM111) and non-nanoform (NM113) upon the application of the cascade *in vitro* digestion assay using Type 3 formulation (DIN juices). 67mg/L in saliva is the tested concentration. Figure 4 of the main text shows the dissolved percentage at the respective final time points of the three compartments. Saliva phase 0 to 5 min., stomach phase 5 to 125 min., intestine phase 125 to 240 min.

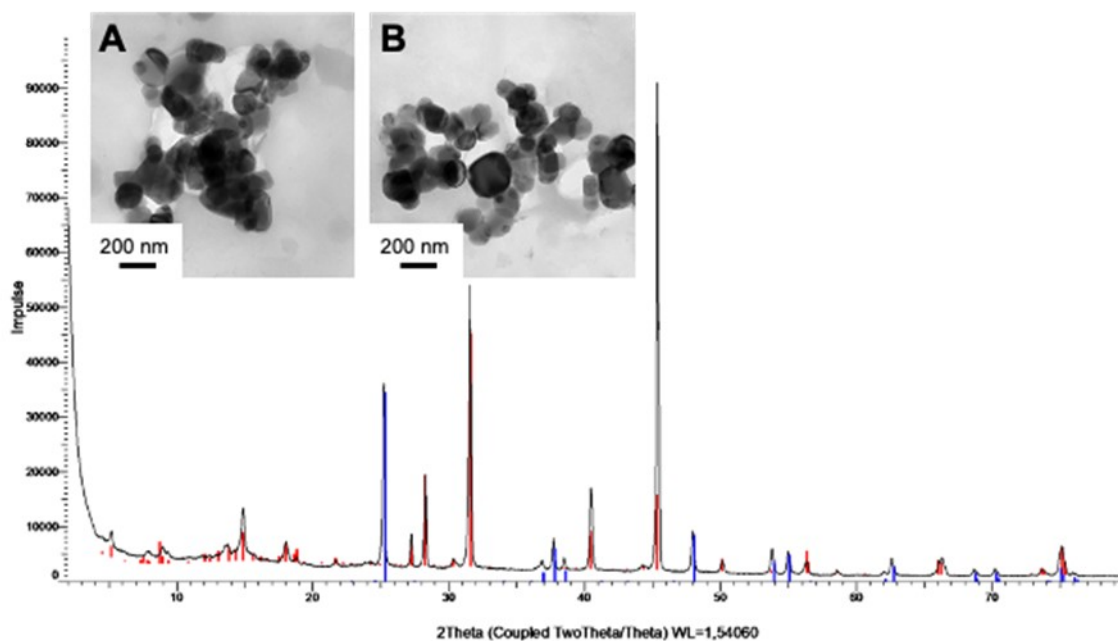

**Figure S17:** TiO<sub>2</sub> E171 dissolution upon the application of the cascade *in vitro* digestion assay analyzed by XRD in DIN juices. TiO<sub>2</sub> E171 pristine particles (blue), TiO<sub>2</sub> E171 after dissolution in cascaded OGI fluids (black) and the juice background (red). TEM images of E171 after incubation in (A) DIN Type 1 juices and (B) DIN Type 3 juices.

a)

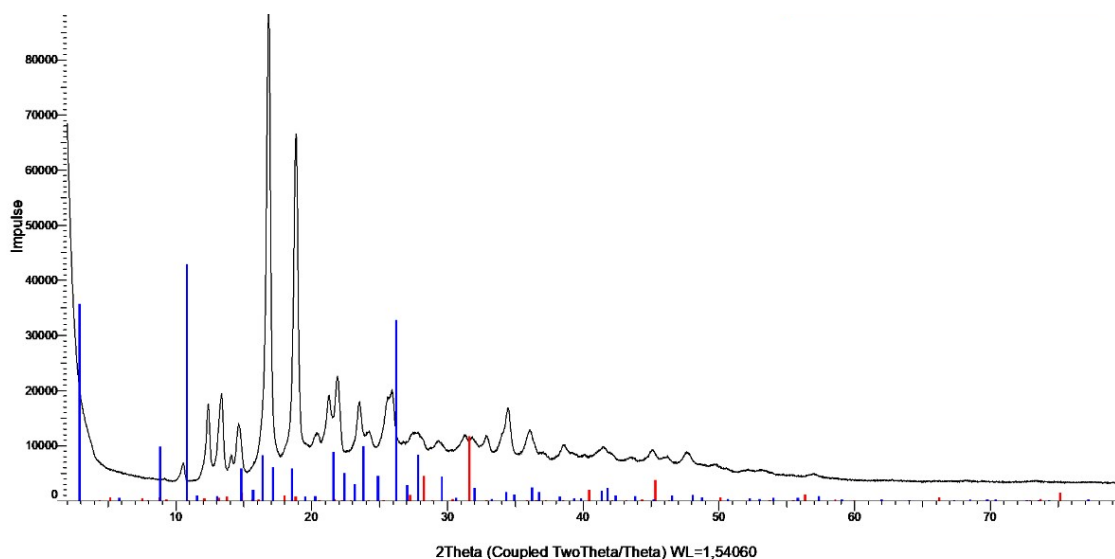

b)

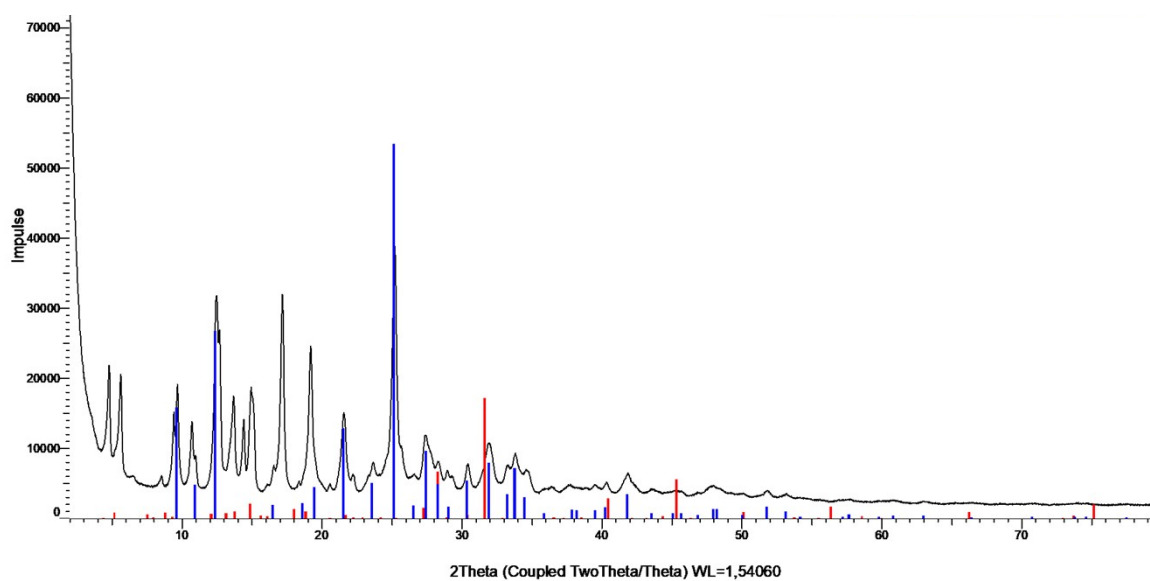

**Figure S18.** XRD analysis of the potential transformation of organic pigments. Diffractogram (black line) after the cascaded *in vitro* digestion assay (DIN Type 1), compared to the pristine reference peaks (blue bars) and to the background of a blank run without pigments (red bars). a) Pigment Yellow 168 (ML2A), b) Pigment Yellow 110 non-nano (Isoindolinone). Apart from the characteristic diffraction angles, also the line broadening is evaluated to obtain the crystallite size (Table S16), and both parameters identify the changes to the diffractogram of Pigment Yellow 168 (ML2A) as borderline significant, and the changes to the diffractogram of Pigment Yellow 110 non-nano (Isoindolinone) as not significant.



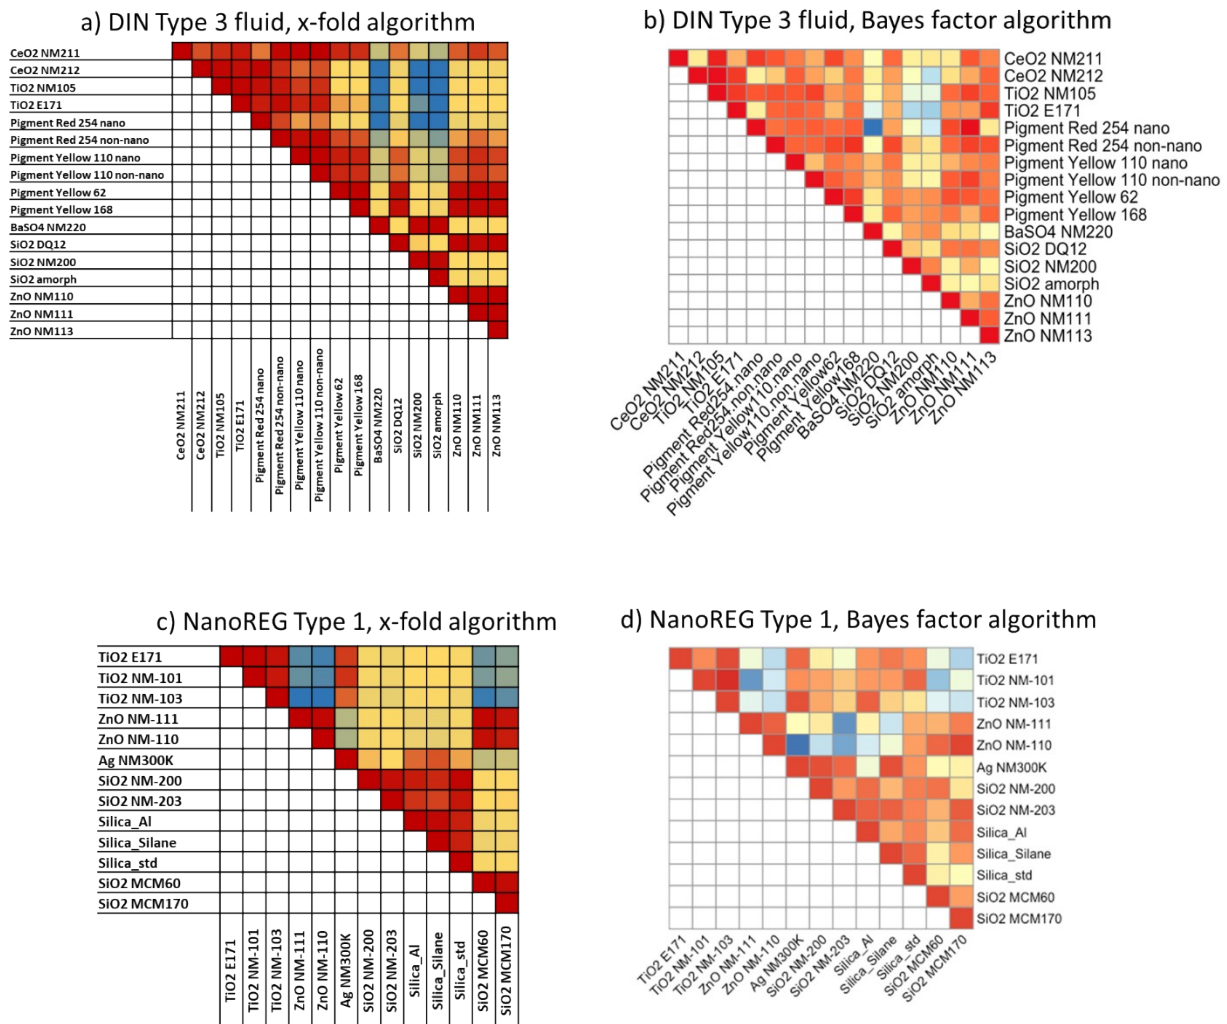

**Figure S19.** Cascaded incubation in simulants without (a,b) or with (c,d) digestive enzymes applied as grouping criterion on different NFs. The identical data of % dissolved in the intestine phase (int2) is represented by two different similarity algorithms, namely a,c) by x-fold algorithm; b,d) by Bayes factor algorithm. See Figure 5 for analogous evaluations of the stomach phases. Color codes were adjusted to each dataset with red indicating similarity, and blue indicating difference: X-fold: Type 3 DIN: red=1, yellow=20, blue=1,000; Type 1 NR: red=1, yellow=5, blue=100. Bayes: Type 3 DIN: red=+2.5, yellow=-2, blue=-6.5; Type 1 NR: red=+2, yellow=0, blue=-3.
